# Supplementary material
Source: PubMed Central journal article supplement (PMC4475432)
Supplement: NIHMS655501-supplement-supplement_1.pdf [file NIHMS655501-supplement-supplement_1.pdf]

**Supplementary Table 1: Baseline characteristics of the ESCAPE trial population stratified by relative agreement between fluid and weight loss**

|                                           | <b>Fluid and weight loss within <math>\pm</math> 50% (N=129)</b> | <b>Fluid <math>\geq</math>50% more than weight loss (N=152)</b> | <b>Weight <math>\geq</math> 50% more than fluid loss (N=67)</b> | <b>p-value</b> |
|-------------------------------------------|------------------------------------------------------------------|-----------------------------------------------------------------|-----------------------------------------------------------------|----------------|
| <b>Demographics</b>                       |                                                                  |                                                                 |                                                                 |                |
| Age (y)                                   | 56.6 $\pm$ 13.9                                                  | 53.5 $\pm$ 13.4                                                 | 58.4 $\pm$ 13.9                                                 | 0.028*         |
| White race                                | 59.7%                                                            | 59.9%                                                           | 53.7%                                                           | 0.664          |
| Male                                      | 77.5%                                                            | 72.4%                                                           | 68.7%                                                           | 0.372          |
| <b>Medical History</b>                    |                                                                  |                                                                 |                                                                 |                |
| Hypertension                              | 40.3%                                                            | 46.1%                                                           | 58.2%                                                           | 0.058          |
| Diabetes                                  | 31.8%                                                            | 30.3%                                                           | 43.3%                                                           | 0.152          |
| Ischemic etiology                         | 56.6%                                                            | 43.4%                                                           | 52.2%                                                           | 0.082          |
| <b>Admission Physical Exam</b>            |                                                                  |                                                                 |                                                                 |                |
| Heart rate (beats/min)                    | 82.1 $\pm$ 15.1                                                  | 81.6 $\pm$ 14.8                                                 | 81.3 $\pm$ 15.9                                                 | 0.859          |
| Systolic blood pressure (mmHg)            | 105.7 $\pm$ 15.8                                                 | 104.6 $\pm$ 14.8                                                | 107.9 $\pm$ 19.3                                                | 0.920          |
| Jugular venous distention                 | 61.4%                                                            | 53.3%                                                           | 41.8%                                                           | 0.032*         |
| Edema > 1+                                | 44.2%                                                            | 25.7%                                                           | 34.3%                                                           | 0.005*         |
| Hepatojugular reflux                      | 84.0%                                                            | 77.4%                                                           | 81.5%                                                           | 0.383          |
| <b>Cardiac Function</b>                   |                                                                  |                                                                 |                                                                 |                |
| Ejection fraction (%)                     | 20 (15-23)                                                       | 20 (15-25)                                                      | 20 (15-26)                                                      | 0.217          |
| <b>Laboratory Values</b>                  |                                                                  |                                                                 |                                                                 |                |
| Serum sodium (mEq/L)                      | 135.9 $\pm$ 4.7                                                  | 136.8 $\pm$ 4.5                                                 | 137.4 $\pm$ 4.2                                                 | 0.035*         |
| B-type natriuretic peptide (pg/mL)        | 770 (268-1482)                                                   | 518 (170-1048)                                                  | 511 (266-1004)                                                  | 0.081          |
| eGFR (mL/min/1.73m <sup>2</sup> )         | 57.7 $\pm$ 23.2                                                  | 60.5 $\pm$ 26.9                                                 | 54.2 $\pm$ 27.6                                                 | 0.189          |
| Blood urea nitrogen (mg/dL)               | 33.2 $\pm$ 17.9                                                  | 33.1 $\pm$ 20.4                                                 | 38.2 $\pm$ 29.2                                                 | 0.764          |
| Hemoglobin (g/dL)                         | 12.7 $\pm$ 1.6                                                   | 12.6 $\pm$ 2.0                                                  | 12.1 $\pm$ 1.7                                                  | 0.127          |
| Right atrial pressure (mmHg)              | 16.4 $\pm$ 11.9                                                  | 12.4 $\pm$ 6.0                                                  | 10.0 $\pm$ 6.8                                                  | 0.001*         |
| Pulmonary capillary wedge pressure (mmHg) | 27.9 $\pm$ 10.0                                                  | 26.0 $\pm$ 9.2                                                  | 19.9 $\pm$ 6.7                                                  | 0.002*         |
| Cardiac index (L/min/m <sup>2</sup> )     | 1.9 $\pm$ 0.6                                                    | 2.0 $\pm$ 0.6                                                   | 2.1 $\pm$ 0.6                                                   | 0.359          |
| Systemic vascular resistance              | 1571.5 $\pm$ 942.4                                               | 1397.5 $\pm$ 802.2                                              | 1444.8 $\pm$ 690.7                                              | 0.552          |

Fluid vs. Weight Loss -2

(dyn·s/cm<sup>5</sup>)

Medications (Admission)

|                         |               |               |              |       |
|-------------------------|---------------|---------------|--------------|-------|
| Beta blocker            | 59.7%         | 63.2%         | 64.2%        | 0.774 |
| ACE inhibitor or ARB    | 89.9%         | 92.8%         | 85.1%        | 0.208 |
| Digoxin                 | 76.0%         | 73.7%         | 71.6%        | 0.795 |
| Aldosterone antagonist  | 38.4%         | 31.8%         | 31.3%        | 0.446 |
| Loop diuretic dose (mg) | 200 (100-320) | 200 (120-360) | 160 (85-240) | 0.152 |
| Thiazide diuretic       | 12.1%         | 12.4%         | 10.8%        | 0.943 |

---

eGFR: Estimated glomerular filtration rate. ACE: Angiotensin converting enzyme, ARB: Angiotensin receptor blocker. \* Significant p value.

**Supplementary Table 2: Baseline characteristics of the Penn cohort stratified by relative agreement between fluid and weight loss**

|                                       | <b>Fluid and weight<br/>loss within <math>\pm</math> 50%<br/>(N=198)</b> | <b>Fluid <math>\geq</math>50% more<br/>than weight loss<br/>(N=182)</b> | <b>Weight <math>\geq</math> 50%<br/>more than fluid<br/>loss (N=106)</b> | <b>p-value</b> |
|---------------------------------------|--------------------------------------------------------------------------|-------------------------------------------------------------------------|--------------------------------------------------------------------------|----------------|
| <b>Demographics</b>                   |                                                                          |                                                                         |                                                                          |                |
| Age (Years)                           | 62.2 $\pm$ 15.4                                                          | 61.4 $\pm$ 15.4                                                         | 62.9 $\pm$ 15.4                                                          | 0.660          |
| Black race                            | 56.1%                                                                    | 54.4%                                                                   | 72.6%                                                                    | 0.005*         |
| Male                                  | 63.1%                                                                    | 59.9%                                                                   | 51.9%                                                                    | 0.162          |
| <b>Medical History</b>                |                                                                          |                                                                         |                                                                          |                |
| Hypertension                          | 74.7%                                                                    | 66.3%                                                                   | 71.7%                                                                    | 0.191          |
| Diabetes                              | 39.8%                                                                    | 41.8%                                                                   | 45.3%                                                                    | 0.653          |
| Ischemic etiology                     | 30.8%                                                                    | 29.1%                                                                   | 27.4%                                                                    | 0.815          |
| Coronary Artery Disease               | 47.5%                                                                    | 47.8%                                                                   | 43.4%                                                                    | 0.740          |
| <b>Admission Physical Exam</b>        |                                                                          |                                                                         |                                                                          |                |
| Heart rate (beats/min)                | 89.2 $\pm$ 20.0                                                          | 87.7 $\pm$ 18.7                                                         | 90.3 $\pm$ 19.1                                                          | 0.361          |
| Systolic blood pressure<br>(mmHg)     | 129.4 $\pm$ 30.2                                                         | 127.5 $\pm$ 31.2                                                        | 142.1 $\pm$ 38.3                                                         | 0.007*         |
| Jugular venous distention             | 62.7%                                                                    | 48.6%                                                                   | 52.5%                                                                    | 0.023*         |
| Edema > 1+                            | 50.5%                                                                    | 43.0%                                                                   | 44.7%                                                                    | 0.320          |
| Hepatojugular reflux                  | 26.0%                                                                    | 30.5%                                                                   | 26.0%                                                                    | 0.676          |
| <b>Cardiac Function</b>               |                                                                          |                                                                         |                                                                          |                |
| Ejection fraction (%)                 | 25 (15-45)                                                               | 23 (15-35)                                                              | 28 (15-43)                                                               | 0.126          |
| <b>Laboratory Values</b>              |                                                                          |                                                                         |                                                                          |                |
| Serum sodium (mEq/L)                  | 137.8 $\pm$ 4.8                                                          | 137.9 $\pm$ 4.3                                                         | 138.7 $\pm$ 4.8                                                          | 0.250          |
| B-type natriuretic peptide<br>(pg/mL) | 1359 (771-2516)                                                          | 1456 (813-2464)                                                         | 1581 (723-2966)                                                          | 0.681          |
| eGFR (mL/min/1.73m <sup>2</sup> )     | 55.6 $\pm$ 26.1                                                          | 55.4 $\pm$ 25.1                                                         | 63.8 $\pm$ 31.6                                                          | 0.077          |
| BUN (mg/dL)                           | 32.2 $\pm$ 21.9                                                          | 33.9 $\pm$ 27.4                                                         | 27.1 $\pm$ 19.6                                                          | 0.016*         |
| Hemoglobin (g/dL)                     | 12.1 $\pm$ 2.0                                                           | 12.4 $\pm$ 2.1                                                          | 12.3 $\pm$ 2.0                                                           | 0.661          |
| <b>Medications (Admission)</b>        |                                                                          |                                                                         |                                                                          |                |
| Beta blocker                          | 78.3%                                                                    | 78.0%                                                                   | 68.9%                                                                    | 0.139          |

Fluid vs. Weight Loss -4

|                         |             |             |           |         |
|-------------------------|-------------|-------------|-----------|---------|
| ACE inhibitor or ARB    | 69.2%       | 63.7%       | 65.1%     | 0.511   |
| Digoxin                 | 24.7%       | 40.1%       | 21.9%     | 0.001*  |
| Aldosterone antagonist  | 19.2%       | 25.8%       | 15.2%     | 0.079   |
| Loop diuretic dose (mg) | 40 (20-130) | 80 (40-160) | 40 (0-80) | <0.001* |
| Thiazide diuretic       | 12.1%       | 13.2%       | 11.4%     | 0.901   |

---

**Supplementary Table 3: In-hospital and discharge characteristics of the ESCAPE trial population stratified by relative agreement between fluid and weight loss**

|                                                               | <b>Fluid and weight loss within <math>\pm</math> 50% (N=129)</b> | <b>Fluid <math>\geq</math>50% more than weight loss (N=152)</b> | <b>Weight <math>\geq</math> 50% more than fluid loss (N=67)</b> | <b>p-value</b> |
|---------------------------------------------------------------|------------------------------------------------------------------|-----------------------------------------------------------------|-----------------------------------------------------------------|----------------|
| <b>Diuresis Related Parameters</b>                            |                                                                  |                                                                 |                                                                 |                |
| Peak IV loop diuretic dose in 24 hours (mg)                   | 240 (120-400)                                                    | 240 (120-400)                                                   | 160 (80-320)                                                    | 0.078          |
| Adjuvant thiazide diuretic                                    | 33.3%                                                            | 24.5%                                                           | 27.7%                                                           | 0.269          |
| Net fluid loss (L)                                            | 6.6 $\pm$ 5.3                                                    | 6.7 $\pm$ 4.9                                                   | 1.7 $\pm$ 2.4                                                   | <0.001*        |
| Weight loss (Kg)                                              | 6.1 $\pm$ 4.6                                                    | 1.7 $\pm$ 2.5                                                   | 3.3 $\pm$ 6.4                                                   | <0.001*        |
| <b>Non-diuresis related parameters</b>                        |                                                                  |                                                                 |                                                                 |                |
| Inotrope use (%)                                              | 36.8%                                                            | 41.2%                                                           | 36.5%                                                           | 0.700          |
| Length of stay (days)                                         | 6 (4-10)                                                         | 7 (5-10)                                                        | 6 (4-12)                                                        | 0.708          |
| Treated with pulmonary artery catheter                        | 49.6%                                                            | 48.7%                                                           | 58.2%                                                           | 0.403          |
| <b>Admission to Discharge Change in Laboratory Parameters</b> |                                                                  |                                                                 |                                                                 |                |
| eGFR (%)                                                      | -4.8 $\pm$ 17.6                                                  | -0.6 $\pm$ 15.1                                                 | -2.2 $\pm$ 14.0                                                 | 0.110          |
| Creatinine (%)                                                | 0.2 $\pm$ 0.9                                                    | 0.0 $\pm$ 0.5                                                   | 0.0 $\pm$ 0.5                                                   | 0.068          |
| Worsening renal function                                      | 26.2%                                                            | 17.9%                                                           | 21.9%                                                           | 0.259          |
| Blood urea nitrogen (%)                                       | 31.1 $\pm$ 62.6                                                  | 16.7 $\pm$ 49.1                                                 | 13.6 $\pm$ 61.6                                                 | 0.106          |
| Sodium (%)                                                    | -1.1 $\pm$ 3.0                                                   | -1.1 $\pm$ 2.8                                                  | -1.1 $\pm$ 3.4                                                  | 0.961          |
| Hemoglobin (%)                                                | 1.6 $\pm$ 11.8                                                   | 0.2 $\pm$ 14.1                                                  | 0.2 $\pm$ 13.4                                                  | 0.555          |
| Hematocrit (%)                                                | 2.4 $\pm$ 12.7                                                   | 0.1 $\pm$ 11.6                                                  | 0.4 $\pm$ 13.3                                                  | 0.315          |
| Albumin (%)                                                   | 3.4 $\pm$ 13.2                                                   | -2.7 $\pm$ 10.8                                                 | -2.0 $\pm$ 13.5                                                 | 0.045*         |
| Total Protein (%)                                             | 6.9 $\pm$ 22.1                                                   | -0.8 $\pm$ 10.1                                                 | -3.0 $\pm$ 20.4                                                 | 0.005*         |
| <b>Discharge Physical Examination</b>                         |                                                                  |                                                                 |                                                                 |                |
| Rales                                                         | 7.0%                                                             | 9.2%                                                            | 10.8%                                                           | 0.654          |
| Ascites                                                       | 4.0%                                                             | 2.0%                                                            | 4.7%                                                            | 0.502          |
| Hepatomegaly                                                  | 21.0%                                                            | 17.1%                                                           | 22.2%                                                           | 0.609          |
| Jugular venous distention                                     | 33.9%                                                            | 33.6%                                                           | 35.5%                                                           | 0.964          |

## Fluid vs. Weight Loss -6

|                                                       |                |                |                |        |
|-------------------------------------------------------|----------------|----------------|----------------|--------|
| Edema > 1+                                            | 22.7%          | 15.1%          | 20.0%          | 0.267  |
| Invasive hemodynamics (Final)                         |                |                |                |        |
| Right atrial pressure (mmHg)                          | 9.6 ± 5.7      | 9.1 ± 5.0      | 8.2 ± 6.0      | 0.367  |
| Pulmonary capillary wedge pressure (mmHg)             | 18.4 ± 8.7     | 17.2 ± 7.0     | 14.5 ± 7.2     | 0.313  |
| Cardiac index (L/min/m <sup>2</sup> )                 | 2.4 ± 0.6      | 2.3 ± 0.6      | 2.4 ± 0.8      | 0.822  |
| Systemic vascular resistance (dyn·s/cm <sup>5</sup> ) | 1061.8 ± 432.4 | 1108.2 ± 454.1 | 1150.4 ± 499.9 | 0.662  |
| Invasive hemodynamics (Change)                        |                |                |                |        |
| Right atrial pressure (mmHg)                          | -6.6 ± 13.2    | -2.9 ± 5.5     | -3.1 ± 5.7     | 0.185  |
| Pulmonary capillary wedge pressure (mmHg)             | -8.1 ± 9.6     | -8.1 ± 9.5     | -6.9 ± 6.8     | 0.937  |
| Cardiac index (L/min/m <sup>2</sup> )                 | 0.5 ± 0.7      | 0.3 ± 0.6      | 0.4 ± 0.7      | 0.468  |
| Systemic vascular resistance (dyn·s/cm <sup>5</sup> ) | -484.5 ± 905.4 | -293.3 ± 787.4 | -299.8 ± 509.2 | 0.236  |
| Discharge Medications                                 |                |                |                |        |
| Thiazide diuretic                                     | 15.5%          | 9.9%           | 11.9%          | 0.357  |
| ACE inhibitor or ARB                                  | 87.6%          | 91.4%          | 85.1%          | 0.334  |
| Digoxin                                               | 82.9%          | 79.6%          | 71.6%          | 0.178  |
| Beta blocker                                          | 56.6%          | 57.9%          | 59.7%          | 0.915  |
| Discharge loop diuretic dose (mg)                     | 120 (80-160)   | 120 (80-240)   | 80 (40-160)    | 0.012* |

---

**Supplementary Table 4: In-hospital and discharge characteristics of the Penn cohort stratified by relative agreement between fluid and weight loss**

|                                                               | <b>Fluid and weight loss within <math>\pm</math> 50% (N=198)</b> | <b>Fluid <math>\geq</math>50% more than weight loss (N=182)</b> | <b>Weight <math>\geq</math> 50% more than fluid loss (N=106)</b> | <b>p-value</b> |
|---------------------------------------------------------------|------------------------------------------------------------------|-----------------------------------------------------------------|------------------------------------------------------------------|----------------|
| <b>Diuresis Related Parameters</b>                            |                                                                  |                                                                 |                                                                  |                |
| Cumulative IV loop diuretic dose (mg)                         | 400 (180-800)                                                    | 320 (120-745)                                                   | 210 (120-353)                                                    | <0.001*        |
| Peak IV loop diuretic dose in 24 hours (mg)                   | 160 (80-240)                                                     | 120 (50-220)                                                    | 80 (40-160)                                                      | <0.001*        |
| Continuous diuretic infusion                                  | 9.1%                                                             | 5.5%                                                            | 0.9%                                                             | 0.016*         |
| Adjuvant thiazide diuretic                                    | 22.8%                                                            | 14.8%                                                           | 8.5%                                                             | 0.004*         |
| Net fluid loss (L)                                            | 7.2 $\pm$ 5.5                                                    | 6.3 $\pm$ 8.2                                                   | 1.5 $\pm$ 2.3                                                    | <0.001*        |
| Fluid intake (L)                                              | 8.9 $\pm$ 5.4                                                    | 10.0 $\pm$ 6.6                                                  | 7.2 $\pm$ 4.2                                                    | 0.001*         |
| Fluid output (L)                                              | 16.1 $\pm$ 9.1                                                   | 16.3 $\pm$ 10.7                                                 | 8.7 $\pm$ 4.5                                                    | <0.001*        |
| Ratio of intake to output                                     | 0.57 $\pm$ 0.12                                                  | 0.70 $\pm$ .067                                                 | 0.87 $\pm$ 0.35                                                  | <0.001*        |
| Change in Weight (Kg)                                         | 6.5 $\pm$ 4.9                                                    | 1.9 $\pm$ 3.4                                                   | 3.1 $\pm$ 9.6                                                    | <0.001*        |
| <b>Non-diuresis related parameters</b>                        |                                                                  |                                                                 |                                                                  |                |
| Treated on a cardiology service                               | 72.2%                                                            | 74.6%                                                           | 54.7%                                                            | 0.001*         |
| Length of stay (days)                                         | 6 (4-9)                                                          | 7 (4-10)                                                        | 5 (3-7)                                                          | 0.002*         |
| Inotrope use (%)                                              | 19.6                                                             | 23.3                                                            | 13.3                                                             | 0.122          |
| <b>Admission to Discharge Change in Laboratory Parameters</b> |                                                                  |                                                                 |                                                                  |                |
| eGFR (%)                                                      | -2.2 $\pm$ 13.7                                                  | 1.5 $\pm$ 14.0                                                  | 3.2 $\pm$ 16.4                                                   | 0.035*         |
| Creatinine (%)                                                | 0.1 $\pm$ 0.4                                                    | 0.0 $\pm$ 0.4                                                   | 0.0 $\pm$ 0.3                                                    | 0.150          |
| Worsening renal function                                      | 21.2%                                                            | 13.8%                                                           | 15.1%                                                            | 0.133          |
| Blood urea nitrogen (%)                                       | 4.2 $\pm$ 15.5                                                   | 2.3 $\pm$ 16.3                                                  | 2.2 $\pm$ 12.7                                                   | 0.749          |
| Sodium (%)                                                    | -0.6 $\pm$ 3.2                                                   | -0.6 $\pm$ 2.7                                                  | -1.8 $\pm$ 7.5                                                   | 0.131          |
| Hemoglobin (%)                                                | -1.1 $\pm$ 10.3                                                  | -3.1 $\pm$ 9.2                                                  | -1.3 $\pm$ 13.1                                                  | 0.194          |
| Hematocrit (%)                                                | -0.7 $\pm$ 13.3                                                  | -3.0 $\pm$ 9.6                                                  | -1.6 $\pm$ 12.8                                                  | 0.375          |
| <b>Discharge Physical Examination</b>                         |                                                                  |                                                                 |                                                                  |                |
| Systolic blood pressure (mmHg)                                | 115.1 $\pm$ 25.8                                                 | 111.9 $\pm$ 23.6                                                | 121.3 $\pm$ 26.4                                                 | 0.010*         |

Fluid vs. Weight Loss -8

|                                          |             |             |             |        |
|------------------------------------------|-------------|-------------|-------------|--------|
| Heart rate (beats/min)                   | 77.5 ± 16.5 | 79.4 ± 13.4 | 77.8 ± 14.3 | 0.254  |
| Jugular venous distention (≥ 8 cm water) | 23.5%       | 23.4%       | 15.5%       | 0.291  |
| Edema > 1+                               | 14.4%       | 16.9%       | 16.3%       | 0.801  |
| Hepatojugular reflux                     | 6.6%        | 5.2%        | 1.5%        | 0.289  |
| Discharge Medications                    |             |             |             |        |
| Thiazide diuretic                        | 9.3%        | 9.5%        | 10.6%       | 0.933  |
| ACE inhibitor or ARB                     | 77.3%       | 79.8%       | 77.9%       | 0.840  |
| Aldosterone Antagonist                   | 28.9%       | 30.2%       | 21.2%       | 0.234  |
| Beta blocker                             | 90.2%       | 89.4%       | 85.6%       | 0.463  |
| Loop Diuretic (mg)                       | 80 (40-160) | 80 (40-160) | 70 (20-160) | 0.012* |

---
